# Supplementary material
Source: PubMed Central journal article supplement (PMC3670710)
Supplement: NIHMS457160-supplement-01.pdf [file NIHMS457160-supplement-01.pdf]

**Table S1. Primers Used to Generate DNA FISH Probes, Related to Experimental Procedures**

*hunchback*

| <b>Forward primer</b>  | <b>Reverse primer</b>   |
|------------------------|-------------------------|
| AGGCTACTGAGATCCTGCTTGG | GCGTGGTTTGCTGTGGGAAATG  |
| AAACGTGCCCTCCTGTTAAGTG | TAGATGGGCGGATATGGGTCTC  |
| TCGAGTTCATCCCTCAACCTCC | GACAACAATTCCACTCAGCCAC  |
| AGTCAATAGCTGGGAAAGGAGG | AGATGTGAGCCCAGTGTAAATCC |
| GGGCAACTTTAAGCCCAGACA  | GGCATGGACTTTTCGGCAATTA  |
| TCCAACATTACGCAGTACGCAG | CACTATTGTTTGGCCGCATAGC  |

*worniu*

| <b>Forward primer</b>  | <b>Reverse primer</b>   |
|------------------------|-------------------------|
| GAGCTTCGGGACTTCAGGTTTG | CACCGAACCCAAAGTACGTAC   |
| TTGCTTTACGGCCTGTCAGATG | TATCCCAACAAGCTCACGATCC  |
| ATGTCGGCTCTCGATGTCTTTC | TTAATCTAACC GCCGTAGCGAG |
| TCGAAATGCCAGCGAGACAATG | TGCATTTGGTAGACAGCACTCG  |
| CTTCCGACGCCGCATAAATTAG | AGCTCATCCACCATCCTCCATC  |
| AGGATGGTGGATGAGCTGGTTC | ATATGGCTCACCCGGTAATTGC  |
| ATTGTATGCACTTCCCTCGCTG | CCCTTGATCCCTGATTGCATC   |

*muscleblind*

| <b>Forward primer</b>  | <b>Reverse primer</b>  |
|------------------------|------------------------|
| ACTTTCGGGTTCGAGATCCTTG | TTCTAGGAGGACGGACAGGTTG |
| ACTTGTGGGTGGCAGCTATC   | ACATGCTTGGTTGAGTTCCAC  |
| TCCACTCGCGTCTTTCGATAC  | AATCGGGCTGAAGGGATTGG   |
| TTGCTGCCGCCAATTACCAATC | TGCAGATCCAGATCGAGGAAC  |
| TCTGGATCTGCATCTGGTTCG  | GACTCGAACTCTCTCGCTCTC  |
| GTACACTGGCAACTGGTTTGG  | ATTTGTCCTGCATGTGTTGTCC |
